# Supplementary material for: Graphene-Enhanced Methacrylated Alginate Gel Films for Sustainable Dye Removal in Water Purification
Source: MDPI journal article supplement (doi:10.3390/gels10010025), 2023-12-27
Supplement: s1 [file s1]

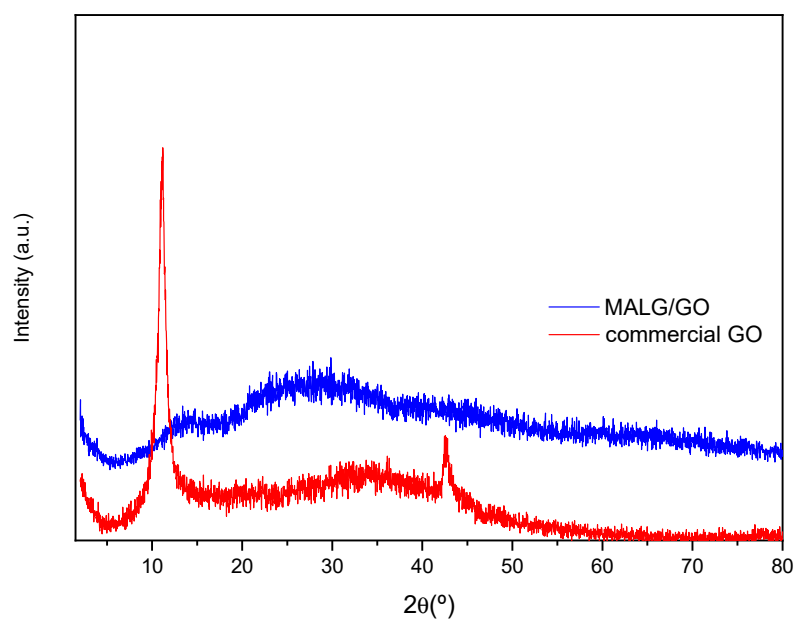

**Figure S1.** XRD powder diffractograms of the commercial GO and a MALG/GO5 film samples.

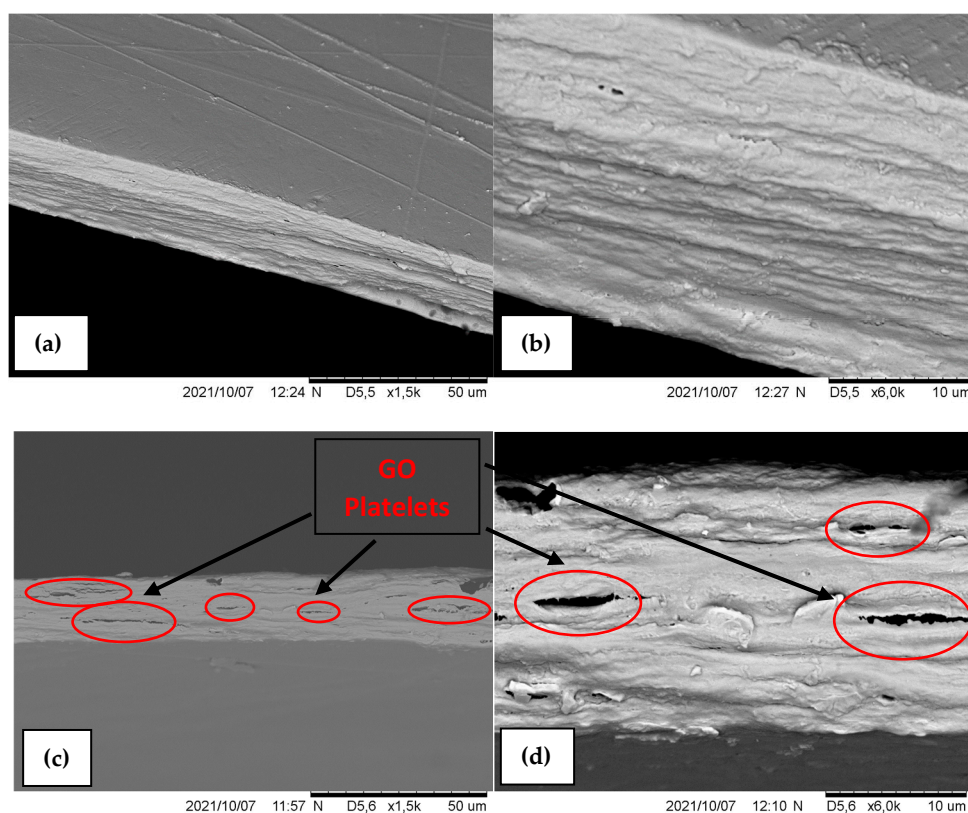

**Figure S2.** Cross-sectional SEM images of (a), (b): MALG film at magnifications x1500 and x6000; (b), (c): MALG/GO5 film indicating the GO platelets at magnifications x1500 and x6000.
